# Supplementary material for: MR Imaging Features to Differentiate Retinoblastoma from Coats’ Disease and Persistent Fetal Vasculature
Source: PubMed Central journal article supplement (PMC7760210; doi:10.3390/cancers12123592), 2020-11-30
Supplement: cancers-12-03592-s001.pdf [file cancers-12-03592-s001.pdf]

## Supplementary Materials

|                    |                                                                                                        |         |                  |                 |             |
|--------------------|--------------------------------------------------------------------------------------------------------|---------|------------------|-----------------|-------------|
| Eye                | 1 Eye size compared to contralateral                                                                   | Smaller | Same             | Larger          |             |
|                    | 2 Shallowness of the anterior eye chamber                                                              | No      |                  | Yes             |             |
|                    | 3 Ciliary body deformations                                                                            | No      |                  |                 |             |
|                    | 4 Lens deformations                                                                                    | No      |                  | Yes             |             |
|                    | 5 Optic nerve atrophy                                                                                  | No      |                  | Yes             |             |
| Retinal detachment | 6 Retinal detachment                                                                                   | No      |                  | Yes             |             |
|                    | 7 Presence of central stalk between optic disc and lens                                                | No      |                  | Yes             |             |
|                    | 8 Shape of retinal detachment                                                                          | T shape | Martini Glass    | Sharp V         | Wide V      |
|                    | 9 Intensity of subretinal fluid on T2 compared to vitreous                                             | Lower   | Equal            | Higher          |             |
|                    | 10 Intensity of subretinal fluid on T1 compared to vitreous                                            |         | Equal            | Higher          | Much higher |
|                    | 11 Presence of intraretinal cyst-like lesion                                                           | No      |                  | Yes             |             |
| Lesion             | 12 Presence of solid lesion component (solid appearing lesion or T2 hypointense area)                  | No      |                  | Yes             |             |
|                    | 13 Calcification within solid lesion component                                                         | No      | Possibly         | Yes             |             |
|                    | 14 Spontaneous T1 hyperintense area within lesion                                                      | No      |                  | Yes             |             |
|                    | 15 Presence of lesion islands (small nodules, T2 dark foci, that are RB seedings or resemble seedings) | No      | Yes, in vitreous | Yes, subretinal |             |
| Enhancement        | 16 Degree of enhancement of solid component (when present)                                             | None    | Minimal          | Moderate        | Strong      |
|                    | 17 Degree of enhancement of anterior eye segment                                                       | None    | Minimal          | Moderate        | Strong      |
|                    | 18 Degree of enhancement of uvea (excluding AES) compared to contralateral                             | Less    | Equal            | More            |             |
|                    | 19 No/minimal contrast enhancement within solid component                                              | No      |                  | Yes             |             |
|                    | 20 Enhancement mismatch: contrast enhancement outside solid lesion / T2 hypo-intense area              | No      |                  | Yes             |             |

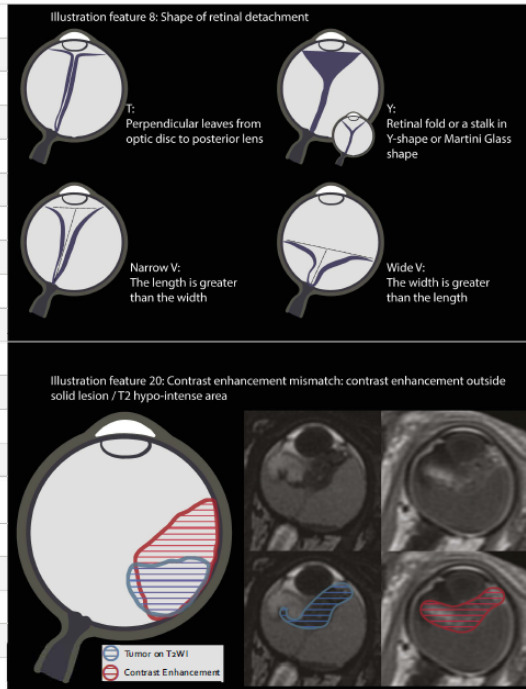

**Figure S1.** Adopted MR imaging scoring item list for retinoblastoma, persistent fetal vasculature (PFV) and Coats' disease, including example images and illustrations.

**Table S1.** Association of individual MR imaging features with diagnosis (retinoblastoma, Coats' disease, PFV/retinal dysplasia).

| Feature# | MR Imaging feature                                                                                                 | Fleiss' Kappa for interreader agreement | Fisher freeman halton Exact (2-sided) <i>p</i> value for association with diagnosis | Bonferroni corrected <i>p</i> value for association with diagnosis |
|----------|--------------------------------------------------------------------------------------------------------------------|-----------------------------------------|-------------------------------------------------------------------------------------|--------------------------------------------------------------------|
| 1        | Eye size compared to contralateral                                                                                 | 0.37                                    | <0.001                                                                              | <0.001                                                             |
| 2        | Shallowness of the anterior eye chamber                                                                            | 0.71                                    | 0.022                                                                               | 0.446                                                              |
| 3        | Ciliary body deformations                                                                                          | 0.39                                    | <0.001                                                                              | <0.001                                                             |
| 4        | Lens deformations                                                                                                  | 0.53                                    | <0.001                                                                              | <0.001                                                             |
| 5        | Optic nerve atrophy                                                                                                | 0.49                                    | <0.001                                                                              | <0.001                                                             |
| 6        | Retinal detachment                                                                                                 | 0.49                                    | 0.476                                                                               | 1.000                                                              |
| 7        | Central stalk between optic disc and lens                                                                          | 0.43                                    | <0.001                                                                              | <0.001                                                             |
| 8        | Shape of retinal detachment                                                                                        | 0.40                                    | 0.001                                                                               | 0.021                                                              |
| 9        | Intensity of subretinal fluid on T2 compared to vitreous                                                           | 0.34                                    | 0.021                                                                               | 0.424                                                              |
| 10       | Intensity of subretinal fluid on T1 compared to vitreous                                                           | 0.44                                    | 0.009                                                                               | 0.180                                                              |
| 11       | Intraretinal macrocyst                                                                                             | 0.55                                    | <0.001                                                                              | 0.005                                                              |
| 12       | Solid lesion component (solid appearing lesion or T2 hypointense area)                                             | 0.26                                    | 0.100                                                                               | 1.000                                                              |
| 13       | Absence of (possible) calcifications                                                                               | 0.35                                    | <0.001                                                                              | <0.001                                                             |
| 14       | Spontaneous T1 hyperintense area within lesion                                                                     | 0.21                                    | 0.068                                                                               | 1.000                                                              |
| 15       | Presence of lesion islands (small nodules, T2 hypointense foci that are retinoblastoma seeding or resembling foci) | 0.44                                    | 0.001                                                                               | 0.018                                                              |
| 16       | Degree of enhancement of solid component                                                                           | 0.25                                    | 0.799                                                                               | 1.000                                                              |
| 17       | Degree of enhancement of anterior eye segment                                                                      | 0.23                                    | 0.042                                                                               | 0.847                                                              |
| 18       | Degree of enhancement of uvea (excluding AES) compared to contralateral                                            | 0.15                                    | 0.253                                                                               | 1.000                                                              |
| 19       | No/minimal contrast enhancement within solid component                                                             | 0.35                                    | <0.001                                                                              | 0.008                                                              |
| 20       | Enhancement mismatch: contrast enhancement outside solid lesion                                                    | 0.15                                    | <0.001                                                                              | 0.001                                                              |

**Table S2.** Sensitivity, specificity and accuracy for predicting diagnosis for imaging features significantly associated with diagnosis.

|                                                                                        | <b>Sensitivity (95%CI)</b> | <b>Specificity (95%CI)</b> | <b>Accuracy (95%CI)</b> |
|----------------------------------------------------------------------------------------|----------------------------|----------------------------|-------------------------|
| Smaller eye size predicting pseudoretinoblastoma                                       | 71% (53–85%)               | 91% (76–98%)               | 81% (69–89%)            |
| Equal eye size predicting retinoblastoma                                               | 81% (64–93%)               | 74% (56–87%)               | 81% (69–87%)            |
| Larger eye size predicting retinoblastoma                                              | 9% (2–25%)                 | 97% (85–100%)              | 54% (41–66%)            |
| Ciliary deformations predicting pseudoretinoblastoma                                   | 30% (65–93%)               | 100% (89–100%)             | 66% (53–77%)            |
| Lens deformations predicting pseudoretinoblastoma                                      | 38% (22–56%)               | 97% (84–100%)              | 68% (55–78%)            |
| Optic nerve atrophy predicting pseudoretinoblastoma                                    | 22% (9–40%)                | 100% (89–100%)             | 62% (49–74%)            |
| Central stalk predicting pseudoretinoblastoma                                          | 24% (11–42%)               | 100% (89–100%)             | 63% (50–74%)            |
| T-shape retinal detachment predicting pseudo                                           | 31% (15–51%)               | 77% (59–90%)               | 55% (42–68%)            |
| Y-shaped retinal detachment predicting pseudoretinoblastoma                            | 28% (13–47%)               | 100% (89–100%)             | 65% (52–77%)            |
| Narrow-V-shape retinal detachment predicting retinoblastoma                            | 25% (11–43%)               | 93% (77–99%)               | 57% (44–70%)            |
| Wide V-shaped retinal detachment predicting retinoblastoma                             | 55% (36–73%)               | 66% (46–82%)               | 60% (47–72%)            |
| Intraretinal macrocysts predicting pseudoretinoblastoma                                | 32% (17–51%)               | 100% (90–100%)             | 66% (54–77%)            |
| Absence of (possible) calcifications predicting pseudoretinoblastoma                   | 62% (42–79%)               | 100% (90–100%)             | 83% (81–91%)            |
| Vitreous lesion islands/seedings predicting retinoblastoma                             | 30% (16–49%)               | 96% (78–100%)              | 58% (44–71%)            |
| Subretinal lesion islands predicting retinoblastoma                                    | 64% (45–80%)               | 76% (58–89%)               | 70% (57–80%)            |
| No/minimal contrast enhancement within solid component predicting pseudoretinoblastoma | 38% (21–57%)               | 97% (85–100%)              | 70% (57–81%)            |
| Enhancement mismatch: contrast enhancement outside solid lesion                        | 37% (20–56%)               | 100% (90–100%)             | 70% (58–81%)            |
